# Supplementary material for: Targeting senescent cells enhances adipogenesis and metabolic function in old age
Source: eLife. 2015 Dec 19;4:e12997. doi: 10.7554/eLife.12997 (PMC4758946; doi:10.7554/eLife.12997)
Supplement: Figure 1—source data 1. — DOI: http://dx.doi.org/10.7554/eLife.12997.004 [file elife-12997-fig1-data1.xlsx]

## Sheet: Sheet1
Fig. 1b	CON	SEN
Patient1	59.2836	18.3178
Patient2	37.2433	14.8809
Patient3	50.2193	34.6053
Patient4	52.6293	26.7354
Patient5	51.4987	18.1342
Patient6	60.5447	15.3451
ave	51.9032	21.3364
sem	3.40385	3.17357
	p-value	6.32664e-05
