# Supplementary material for: Targeting senescent cells enhances adipogenesis and metabolic function in old age
Source: eLife. 2015 Dec 19;4:e12997. doi: 10.7554/eLife.12997 (PMC4758946; doi:10.7554/eLife.12997)
Supplement: Figure 2—source data 1. — DOI: http://dx.doi.org/10.7554/eLife.12997.006 [file elife-12997-fig2-data1.xlsx]

## Sheet: Sheet1
Fig. 2b	D5	D10	D15		D5	D10	D15		D5	D10	D15		D5	D10	D15
	FABP4	FABP4	FABP4		PPARγ	PPARγ	PPARγ		C/EBPα	C/EBPα	C/EBPα		PLIN1	PLIN1	PLIN1
CON1	0.901381	2.31928	4.78076		1.03308	2.10241	2.4657		0.933399	1.71396	3.86781		1.0514	2.57211	1.50189
CON2	1.00874	2.78235	4.63918		0.785887	2.17256	3.05653		0.686946	2.13765	5.17327		0.522594	3.25255	2.60904
CON3	1.38943	1.87665	3.914		1.34744	1.5163	1.83325		0.960633	1.11985	2.30702		1.48592	1.68907	2.68302
CON4	1.06109	2.01177	4.39124		1.08433	1.66402	2.27278		1.21971	1.5363	3.44039		1.4689	1.9273	2.41295
CON5	1.06109	2.01177	4.39124		1.08433	1.66402	2.27278		1.21971	1.5363	3.44039		1.4689	1.9273	2.41295
ave	1.08435	2.20036	4.42328		1.06701	1.82386	2.38021		1.00408	1.60881	3.64578		1.19954	2.27366	2.32397
sem	0.0816546	0.1626	0.147619		0.0892815	0.131316	0.198364		0.100113	0.164367	0.461474		0.188059	0.285392	0.212348
SEN1	0.676328	2.03812	4.84121		0.739964	1.80679	2.4861		0.583257	1.49182	2.71574		0.402095	1.66749	1.68318
SEN2	0.0225062	0.354931	1.54904		0.0263556	0.259498	1.0505		0.0435973	0.384781	1.57086		0.0045129	0.342274	0.978719
SEN3	0.310849	1.10191	2.4727		0.403517	1.01328	1.78749		0.352889	1.06659	2.14431		0.133585	1.04768	1.16234
SEN4	0.248696	0.324205	0.533762		0.257631	0.299976	0.432583		0.214471	0.218589	0.341243		0.156531	0.223643	0.26525
SEN5	0.357928	0.403084	0.971108		0.397031	0.419391	0.661158		0.390603	0.304314	0.619878		0.337881	0.338974	0.444277
ave	0.323261	0.844451	2.07356		0.3649	0.759788	1.28357		0.316963	0.693219	1.47841		0.206921	0.724014	0.906753
sem	0.105363	0.331378	0.764222		0.116042	0.294794	0.378544		0.0902384	0.249882	0.44795		0.0721559	0.277423	0.254829
Blank1	0.575437	4.43787	3.54779		0.740408	2.93798	2.78827		0.592864	2.84412	3.52168		0.57975
Blank2	0.684784	3.78557	2.94351		0.817001	2.43357	2.0315		0.626528	2.18613	2.28423		0.474921
Blank3	0.954569	2.53404	3.53384		0.867246	1.73044	2.10386		0.98753	1.72415	2.96543		1.23835	2.62934	2.55472
Blank4	1.17949	2.72661	4.4323		1.09271	1.97193	2.32865		0.885033	1.75858	3.15134		1.42399	2.71815	3.55327
Blank5	0.93977	2.49308	3.50349		1.09235	1.82771	1.8897		0.756737	1.23306	2.63731		1.26069	2.31355	2.99765
ave	0.866809	3.19543	3.59219		0.921942	2.18032	2.2284		0.769739	1.94921	2.912		0.99554	2.55368	3.03522
sem	0.106963	0.390029	0.238728		0.0725113	0.224536	0.156924		0.075063	0.269895	0.212297		0.194519	0.0950979	0.223755
p-value	0.000449387	0.00627902	0.0165885		0.00136352	0.0109039	0.0333328		0.000932065	0.015554	0.00978521		0.0011524	0.00458653	0.00271496
