# Supplementary material for: Targeting senescent cells enhances adipogenesis and metabolic function in old age
Source: eLife. 2015 Dec 19;4:e12997. doi: 10.7554/eLife.12997 (PMC4758946; doi:10.7554/eLife.12997)
Supplement: Figure 3—source data 1. — DOI: http://dx.doi.org/10.7554/eLife.12997.009 [file elife-12997-fig3-data1.xlsx]

## Sheet: Sheet1
Fig. 3b top		CON	CON+SB431542	SEN	SEN+SB431542		Fig. 3b bottom		CON	CON+Activin A AB	SEN	SEN+Activin A AB
FABP4	Patient1	4.28264	5.07357	1	2.81571		FABP4	Patient1	4.9198	4.73184	1	2.57862
FABP4	Patient2	2.85403	4.93996	1	2.01321		FABP4	Patient2	3.15469	2.93528	1	1.95884
FABP4	Patient3	2.68421	3.40877	1	3.03112		FABP4	Patient3	2.95161	3.71407	1	4.07274
FABP4	Patient4	2.70382	3.30054	1	2.69662		FABP4	Patient4	4.04601	6.21606	1	3.29436
FABP4	Patient5	3.38241	4.47628	1	3.83254		FABP4	Patient5	7.4436	10.2781	1	6.0398
	ave	3.18142	4.23982	1	2.87784			ave	4.50314	5.57507	1	3.58887
	sem	0.30295	0.37511	0	0.293191			sem	0.814077	1.29754	0	0.707301
				p-value	0.00020806						p-value	0.00639926
PPARγ	Patient1	2.61625	2.85205	1	2.1133		PPARγ	Patient1	3.90413	3.07631	1	1.98922
PPARγ	Patient2	2.18404	4.20032	1	1.80313		PPARγ	Patient2	3.94356	2.20457	1	1.73267
PPARγ	Patient3	3.36195	4.07119	1	3.45211		PPARγ	Patient3	3.16565	5.26342	1	4.97605
PPARγ	Patient4	3.53596	4.12187	1	3.76526		PPARγ	Patient4	5.92781	10.112	1	3.78685
PPARγ	Patient5	4.51007	5.27145	1	4.27689		PPARγ	Patient5	6.53415	10.3927	1	3.81187
	ave	3.24165	4.10338	1	3.08214			ave	4.69506	6.20981	1	3.25933
	sem	0.401226	0.38347	0	0.479869			sem	0.649283	1.72453	0	0.611333
				p-value	0.00248181						p-value	0.00607971
C/EBPα	Patient1	3.11126	5.3852	1	1.09695		C/EBPα	Patient1	3.58755	0.847039	1	1.00069
C/EBPα	Patient2	4.07698	4.66216	1	0.847039		C/EBPα	Patient2	2.63902	1.23499	1	1.76113
C/EBPα	Patient3	2.95632	4.04167	1	2.65765		C/EBPα	Patient3	1.99654	3.63008	1	4.74366
C/EBPα	Patient4	3.256	4.42016	1	2.45317		C/EBPα	Patient4	6.42858	9.50048	1	5.57511
C/EBPα	Patient5	2.92422	3.74431	1	2.27931		C/EBPα	Patient5	4.21637	5.95665	1	2.91905
	ave	3.26495	4.4507	1	1.86683			ave	3.77361	4.23385	1	3.19993
	sem	0.211476	0.281535	0	0.372292			sem	0.765663	1.6052	0	0.866321
				p-value	0.0482859						p-value	0.0347437
PLIN1	Patient1	4.706	4.75353	1	2.02722		PLIN1	Patient1	5.76039	3.48945	1	2.17121
PLIN1	Patient2	7.25261	4.90754	1	0.987943		PLIN1	Patient2	3.49926	1.48306	1	1.74482
PLIN1	Patient3	5.36434	5.53756	1	3.08004		PLIN1	Patient3	3.28456	4.48218	1	5.13086
PLIN1	Patient4	4.19858	5.37998	1	3.03553		PLIN1	Patient4	8.33106	10.1824	1	1.9752
PLIN1	Patient5	6.17633	5.74975	1	4.01918		PLIN1	Patient5	8.47962	10.7294	1	2.18026
	ave	5.53957	5.26567	1	2.62998			ave	5.87098	6.07329	1	2.64047
	sem	0.541469	0.188662	0	0.517518			sem	1.12214	1.85529	0	0.627647
				p-value	0.0136064						p-value	0.0309527
