# Supplementary material for: Targeting senescent cells enhances adipogenesis and metabolic function in old age
Source: eLife. 2015 Dec 19;4:e12997. doi: 10.7554/eLife.12997 (PMC4758946; doi:10.7554/eLife.12997)
Supplement: Figure 4—source data 1. — DOI: http://dx.doi.org/10.7554/eLife.12997.011 [file elife-12997-fig4-data1.xlsx]

## Sheet: Sheet1
Fig.4a-c	baseline	baseline	baseline	3 weeks	3 weeks	3 weeks		Fig.4d	SABG%		Fig.4e	baseline	3 weeks		Fig.4f	PPARγ	C/EBPα	FABP4	LIPIN-1	Adipo	Activin A	IL6	p16	p21
	Fat	Lean	Weight	Fat	Lean	Weight		WT1	24.09		WT1	100	43.2492		WT1	1.47108	0.262429	0.99775	1.27932	0.541159	0.79899	0.441772	1.22222	0.854558
WT1	100	100	100	59.8846	97.7814	85.2941		WT2	11.558		WT2	100	80.3722		WT2	1.4433	2.01321	1.34187	0.767307	1.28755	1.02154	0.754125	1.85961	2.4364
WT2	100	100	100	84.2657	98.5824	94.878		WT3	18.2379		WT3	100	105.539		WT3	0.526635	1.80876	0.707474	0.535655	0.655253	2.43387	2.63787	2.26184	2.78997
WT3	100	100	100	94.1392	96.6326	98.2412		WT4	20.7742		WT4	100	136.567		WT4	0.924583	2.85205	1.32938	1.34478	2.05071	1.13387	1.08476	0.781599	0.958766
WT4	100	100	100	78.5714	96.1575	93.7063		WT5	20		WT5	100	114.451		WT5	1.38211	2.10089	0.949178	1.32627	1.73884	1.46535	2.38895	0.708824	0.895801
WT5	100	100	100	78.607	101.092	98		WT6	22.4365		WT6	100	197.876		WT6	1.06871	1.95206	1.02013	1.41262	1.56496	0.65713	1.08853	1.10765	1.11516
WT6	100	100	100	83.1907	97.6291	93.9904		WT7	16.7598		WT7	100	96.632		WT7	0.816981	0.849391	0.920347	1.03374	0.883698	1.26554	0.499264	0.7884	0.700157
WT7	100	100	100	84.7458	96.5897	94.843		ave	19.1223		WT8	100	156.068		WT8	0.801556	0.105331	0.891156	0.730206	0.444152	0.364313	0.807971	0.402065	0.256717
WT8	100	100	100	71.1816	100.04	95.6395		sem	1.56405		ave	100	116.344		ave	1.05437	1.49302	1.01966	1.05374	1.14579	1.14258	1.2129	1.14153	1.25094
ave	100	100	100	79.3232	98.0631	94.3241		INK1	19.2241		sem	0	16.7866		sem	0.123068	0.344647	0.0766522	0.119088	0.212703	0.222039	0.296524	0.222273	0.312044
sem	0	0	0	3.61922	0.619178	1.42175		INK2	11.0333		INK1	100	50.4022		INK1	1.75488	1.0826	1.03329	1.76893	0.859533	0.679596	0.310976	0.722465	0.144661
INK1	100	100	100	108.271	98.6283	100.997		INK3	10.2703		INK2	100	24.8807		INK2	1.67699	6.25929	2.20038	1.42541	2.10983	0.304022	0.881098	1.15549	0.961428
INK2	100	100	100	85.9736	91.6336	95.2802		INK4	15.5629		INK3	100	36.2071		INK3	1.50355	2.98245	1.0572	1.30394	1.28309	0.595325	0.883239	0.954621	1.57216
INK3	100	100	100	97.8065	96.126	98.1481		INK5	16.6865		INK4	100	61.3544		INK4	2.12046	4.66701	1.11826	2.42146	1.80328	0.401856	0.412617	0.541863	0.74989
INK4	100	100	100	82.8887	99.0127	91.7197		INK6	14.2129		INK5	100	116.116		INK5	1.88868	3.16784	1.2237	1.6585	1.87465	1.09107	0.180851	0.82245	0.354474
INK5	100	100	100	82.7027	96.0562	94.375		INK7	13.2576		INK6	100	110.055		INK6	1.74035	2.59818	1.32984	1.60645	1.87336	0.638496	0.599103	0.584389	1.19976
INK6	100	100	100	86.2661	97.9514	94.3152		ave	14.3211		INK7	100	95.371		INK7	0.580905	0.911301	1.08768	0.724911	0.465426	0.808181	0.322166	1.02349	0.281216
INK7	100	100	100	108.682	96.4121	100.267		sem	1.19062		INK8	100	50.7352		INK8	1.26039	0.246815	1.06124	0.790795	0.710608	0.214084	0.381135	0.310357	0.156827
INK8	100	100	100	84.2502	98.6694	89.8947		p-value	0.031012		ave	100	68.1402		ave	1.56578	2.73944	1.26395	1.46255	1.37247	0.591579	0.496398	0.76439	0.677553
ave	100	100	100	92.105	96.8112	95.6246					sem	0	12.2144		sem	0.166778	0.71549	0.13837	0.19339	0.222175	0.100673	0.0938084	0.0990555	0.187818
sem	0	0	0	3.95364	0.854691	1.39034						p-value	0.0358249		p-value	0.014394	0.0336391	0.0585807	0.032921	0.162557	0.0320963	0.0440395	0.0686962	0.0202733
			p-value	0.0317896	0.255309	0.523724
