# Supplementary material for: Targeting senescent cells enhances adipogenesis and metabolic function in old age
Source: eLife. 2015 Dec 19;4:e12997. doi: 10.7554/eLife.12997 (PMC4758946; doi:10.7554/eLife.12997)
Supplement: Figure 5—source data 1. — DOI: http://dx.doi.org/10.7554/eLife.12997.015 [file elife-12997-fig5-data1.xlsx]

## Sheet: Sheet1
Fig.5a	CON	SEN	SEN+JAKi		Fig.5b	CON	SEN	SEN+JAKi		Fig. 5d	FABP4	PPARγ	PLIN1
Patient1	1	2.63902	1.50943		Patient1	6.7914	56.1141	43.9263		CON	4.4707	4.66055	6.09062
Patient2	1	2.33674	1.59218		Patient2	3.9345	40.1069	28.2018		CON	2.23303	2.26028	3.8886
Patient3	1	2.48285	1.95952		Patient3	5.47276	36.2756	12.0136		CON	1.38703	1.37888	2.37224
Patient4	1	2.81181	1.53315		Patient4	9.12082	44.5062	19.3438		CON	1.6144	1.66324	4.37945
Patient5	1	1.63751	0.779975		Patient5	6.97083	36.7654	9.6315		CON	4.02364	2.43851	6.14362
Patient6	1	2.90492	1.86219		Patient6	11.3298	43.089	22.5556		CON	2.78562	2.02581	3.96412
Patient7	1	2.75204	1.01122		ave	7.27002	42.8095	22.6121		CON	3.14596	3.28524	8.71198
ave	1	2.50927	1.46395		sem	1.07365	2.98047	5.08937		ave	2.80863	2.53036	5.07866
sem	0	0.162882	0.161855			p-value	5.48932e-07	0.00649791		sem	0.440007	0.423177	0.784238
	p-value	8.10839e-07	0.000663522							SEN	1	1	1
										SEN	1	1	1
										SEN	1	1	1
										SEN	1	1	1
										SEN	1	1	1
										SEN	1	1	1
										SEN	1	1	1
										ave	1	1	1
										sem	0	0	0
										SEN+JAKi	2.46741	3.28069	2.73208
										SEN+JAKi	1.67888	1.74352	2.17498
										SEN+JAKi	1.09089	1.17121	1.50368
										SEN+JAKi	1.7225	1.78819	2.58919
										SEN+JAKi	1.77461	1.58557	3.481
										SEN+JAKi	1.78448	1.69056	5.1337
										SEN+JAKi	2.3875	2.7057	9.03485
										ave	1.84375	1.99506	3.80707
										sem	0.176041	0.276158	0.973507
										p-value	0.000438797	0.00362434	0.0137421
