# Supplementary material for: Targeting senescent cells enhances adipogenesis and metabolic function in old age
Source: eLife. 2015 Dec 19;4:e12997. doi: 10.7554/eLife.12997 (PMC4758946; doi:10.7554/eLife.12997)
Supplement: Figure 6—source data 1. — DOI: http://dx.doi.org/10.7554/eLife.12997.018 [file elife-12997-fig6-data1.xlsx]

## Sheet: Sheet1
Fig. 6a-c	0	1M	2M	0	1M	2M	0	1M	2M		Fig. 6d-f	0	1M	2M	0	1M	2M	0	1M	2M
	Fat	Fat	Fat	Lean	Lean	Lean	Weight	Weight	Weight			Fat	Fat	Fat	Lean	Lean	Lean	Weight	Weight	Weight
CON1	5.63	6.08	4.47	25.99	25.48	25.96	34.3	34.7	32.7		CON1	100	107.993	79.3961	100	98.0377	99.8846	100	101.166	95.3353
CON2	3.51	3.36	3.03	23.93	23.93	23.79	29.5	30.2	29.3		CON2	100	95.7265	86.3248	100	100	99.415	100	102.373	99.322
CON3	6.28	6.37	4.75	27.33	26.81	26.97	35.5	36.2	33.9		CON3	100	101.433	75.6369	100	98.0973	98.6828	100	101.972	95.493
CON4	4.7	3.88	3.32	23.87	23.33	23.92	30.8	30.1	29.9		CON4	100	82.5532	70.6383	100	97.7377	100.209	100	97.7273	97.0779
CON5	2.89	2.39	2.31	27.7	28.31	29.07	32.4	33.5	33.6		CON5	100	82.699	79.9308	100	102.202	104.946	100	103.395	103.704
CON6	9.14	8.5	5.86	26.5	26.16	27.07	37.1	37	34.7		CON6	100	92.9978	64.1138	100	98.717	102.151	100	99.7305	93.531
CON7	5.82	5.8	5.32	27.54	27.01	26.66	35.2	35.2	34.4		CON7	100	99.6564	91.4089	100	98.0755	96.8046	100	100	97.7273
CON8	4.81	5.62	3.53	25.45	24.5	25.39	33	32.3	31.5		CON8	100	116.84	73.3888	100	96.2672	99.7642	100	97.8788	95.4545
CON9	4.58	4.43	3.82	26.8	25.46	25.75	33.3	32.5	32.1		CON9	100	96.7249	83.4061	100	95	96.0821	100	97.5976	96.3964
ave	5.26222	5.15889	4.04556	26.1233	25.6656	26.0644	33.4556	33.5222	32.4556		ave	100	97.4026	78.2494	100	98.2372	99.7711	100	100.204	97.1157
sem	0.603268	0.614314	0.381507	0.484596	0.530422	0.54716	0.792869	0.822898	0.643366		sem	0	3.6717	2.78217	0	0.684693	0.8848	0	0.722053	0.990057
INCB1	10.39	10.55	10.17	28.21	27.85	28.5	41.2	41.6	41.4		INCB1	100	101.54	97.8826	100	98.7239	101.028	100	100.971	100.485
INCB2	7.08	7.59	5.75	25.7	25.98	26.75	35.2	36.4	34.8		INCB2	100	107.203	81.2147	100	101.089	104.086	100	103.409	98.8636
INCB3	4.34	5.48	4.72	26.13	24.82	25.16	32.5	32.7	32.1		INCB3	100	126.267	108.756	100	94.9866	96.2878	100	100.615	98.7692
INCB4	10.17	9.8	8.87	26.38	27.12	27.24	39.3	39.8	38.5		INCB4	100	96.3618	87.2173	100	102.805	103.26	100	101.272	97.9644
INCB5	4.89	4.84	4.55	25.9	25.16	25.82	32.8	32.9	32.2		INCB5	100	98.9775	93.047	100	97.1429	99.6911	100	100.305	98.1707
INCB6	2.92	3.58	3.35	26.92	25.8	26.2	31.6	31.2	31.3		INCB6	100	122.603	114.726	100	95.8395	97.3254	100	98.7342	99.0506
INCB7	4.84	5.96	4.93	26.25	26.14	26.54	33.3	34.7	33.6		INCB7	100	123.14	101.86	100	99.581	101.105	100	104.204	100.901
INCB8	3.1	4.39	4.11	25.05	24.48	25.1	30.5	31.2	31.3		INCB8	100	141.613	132.581	100	97.7246	100.2	100	102.295	102.623
INCB9	4.34	5.08	3.95	26.27	25.71	25.7	33.1	33.6	31.8		INCB9	100	117.051	91.0138	100	97.8683	97.8302	100	101.511	96.0725
ave	5.78556	6.36333	5.6	26.3122	25.8956	26.3344	34.3889	34.9	34.1111		ave	100	114.973	100.922	100	98.4179	100.09	100	101.48	99.2112
sem	0.792302	0.662796	0.56954	0.1826	0.276999	0.253145	0.898135	0.964437	0.818438		sem	0	5.04979	5.62068	0	0.877919	0.92849	0	0.584009	0.656137
p-value	0.736162	0.343214	0.0927062	0.635759	0.561154	0.685551	0.563035	0.404111	0.238755		p-value	1	0.0121314	0.00156023	1	0.867968	0.800963	1	0.179169	0.0936821
