# Supplementary material for: Targeting senescent cells enhances adipogenesis and metabolic function in old age
Source: eLife. 2015 Dec 19;4:e12997. doi: 10.7554/eLife.12997 (PMC4758946; doi:10.7554/eLife.12997)
Supplement: Figure 7—source data 1. — DOI: http://dx.doi.org/10.7554/eLife.12997.022 [file elife-12997-fig7-data1.xlsx]

## Sheet: Sheet1
Fig.7a	Ing	Subsc	Epi	Peri	Mesent	Brown	Liver		Fig.7b	PPARγ	CEBPα	FABP4	AdipoQ	Activin A	DGAT2	GPAT4	LIPIN-1	ATGL	HSL
CON1	1.19637	0.528701	2.00906	0.607251	0.619335	0.510574	5.58308		CON1	1.36108	1.42888	1.27707	1.27514	1.41532	1.81745	1.18373	1.19252	1.2324	0.934303
CON2	0.619718	0.341549	1.80634	0.352113	0.521127	0.475352	4.85563		CON2	0.547431	0.401894	0.531388	0.482516	0.927954	0.321505	0.97626	0.490394	0.598107	0.544862
CON3	0.666667	0.401084	1.98645	0.452575	0.520325	0.360434	4.82114		CON3	0.950165	0.602648	0.788038	0.983604	1.09022	0.661775	0.80098	0.951986	0.977708	1.00973
CON4	0.905923	0.487805	1.55052	0.344948	0.602787	0.397213	4.93031		CON4	1.16292	1.66081	1.42784	1.54291	1.06004	0.923326	1.2864	1.26489	1.3779	1.5
CON5	0.706949	0.353474	0.679758	0.208459	0.386707	0.302115	6.16918		CON5	1.35215	1.16021	1.41749	0.919008	1.05968	1.73557	1.08963	1.22605	0.572948	0.915075
CON6	1.64265	0.73487	2.38905	0.487032	0.648415	0.587896	3.67435		CON6	0.607203	0.859392	0.664498	0.773327	0.799198	0.984465	0.669352	0.975364	1.13798	0.890053
CON7	1.54203	0.484058	2.84928	0.826087	0.976812	0.44058	5.31594		CON7	1.7032	1.80924	1.63279	1.55525	0.897899	1.7598	1.17922	1.12897	1.7177	1.70996
CON8	1.16399	0.498392	1.88746	0.418006		0.33119	5.35691		CON8	0.868592	0.964456	0.851535	0.96892	0.866412	0.93149	0.976463	1.05184	0.899176	0.931264
CON9	0.884735	0.504673	2.41745	0.635514	0.757009	0.514019	4.93458		ave	1.06909	1.11094	1.07383	1.06258	1.01459	1.14192	1.02025	1.03525	1.06424	1.05441
ave	1.03656	0.481623	1.95282	0.481332	0.629065	0.435486	5.07124		sem	0.141174	0.176238	0.145777	0.131908	0.0681221	0.198702	0.073522	0.0876599	0.137093	0.131336
sem	0.124942	0.0390399	0.204883	0.061589	0.0591835	0.0317134	0.226931		INCB1	1.28098	1.30621	1.34475	1.42716	0.828242	1.85885	1.10102	1.17773	1.28385	1.52305
INCB1	3.08374	0.918719	3.74877	1.11084	1.133	0.650246	4.80542		INCB2	1.61636	1.53038	1.84017	1.70486	0.946796	1.48135	1.33084	1.23286	1.06916	1.63236
INCB2	1.36842	0.730994	2.44737	0.523392	0.508772	0.464912	3.75439		INCB3	1.40908	2.65532	1.63449	1.56011	0.714559	1.99434	1.18949	1.21589	2.99276	1.58114
INCB3	1.50482	0.752412	2.09003	0.630225	0.562701	0.469453	4.62058		INCB4	1.56293	3.9133	1.32165	1.52219	0.731345	0.810797	1.50717	1.36227	1.71889	1.78011
INCB4	1.72727	0.858289	4.32888	1.03743	0.812834	0.636364	3.9385		INCB5	1.59245	1.49318	1.37301	1.28267	0.671577	1.09309	1.38687	1.8353	2.44948	2.27043
INCB5	1.1246	0.661342	2.19169	0.686901	0.805112	0.517572	4.623		INCB6	1.28677	1.70396	1.81735	1.64564	0.679302	1.70517	1.52979	1.43994	1.57404	2.29098
INCB6		0.516234	1.31494	0.272727	0.516234	0.555195	4.81169		INCB7	1.76694	1.23404	1.99631	1.64165	0.487551	1.87049	1.55492	1.31222	1.16754	1.90919
INCB7	1.52096	0.580838	2.26647	0.598802	0.667665	0.550898	3.73353		INCB8	1.62175	1.83743	1.68676	1.63235	0.735769	1.57769	1.40731	1.36757	1.346	1.88997
INCB8	1.13099	0.57508	1.72204	0.520767	0.658147	0.597444	4.00319		ave	1.51716	1.95923	1.62681	1.55208	0.724393	1.54897	1.37593	1.36797	1.70021	1.85965
INCB9	1.15016	0.565495	2.32907	0.565495		0.412141	5.31949		sem	0.0614519	0.320056	0.0905452	0.049227	0.0465677	0.145177	0.0576952	0.0737135	0.240131	0.104113
ave	1.57637	0.684378	2.49325	0.660731	0.708059	0.539358	4.40109		p-value	0.0114122	0.0358422	0.00614157	0.00370295	0.00341916	0.120348	0.00192892	0.0115272	0.0373498	0.000280091
sem	0.215675	0.0467804	0.317609	0.0872433	0.069321	0.0270165	0.186678
p-value	0.0494968	0.00426355	0.17199	0.112395	0.427567	0.0239958	0.0366138
Fig.7c	Activin A		Activin A		Activin A		Fig.7d	TG		TG		Fig.7e	FFA		FFA		Fig. 7f	TG/LV		TG/LV		Fig. 7g	Total TG		Total TG
w1	112.638	CON1	143.148	INCB1	37.5622		CON1	35.2974	INCB1	28.0186		CON1	0.512621	INCB1	0.36433		CON1	26.0972	INCB1	16.3423		CON1	48.2276	INCB1	20.9835
w2	192.117	CON2	149.703	INCB2	127.106		CON2	12.7207	INCB2	21.7267		CON2	0.506903	INCB2	0.349844		CON2	13.8424	INCB2	11.7216		CON2	19.0886	INCB2	16.844
w3	138.931	CON3	218.795	INCB3	162.928		CON3	17.4088	INCB3	20.493		CON3	0.388727	INCB3	0.343745		CON3	15.7146	INCB3	10.8382		CON3	27.9563	INCB3	15.9647
w4	116.172	CON4	121.81	INCB4	100.327		CON4	22.3436	INCB4	10.7468		CON4	0.442859	INCB4	0.40855		CON4	21.0115	INCB4	13.6896		CON4	29.7313	INCB4	19.8089
w5	50.5963	CON5	172.076	INCB5	161.026		CON5	3.96145	INCB5	19.2593		CON5	0.362424	INCB5	0.405882		CON5	22.6012	INCB5	21.5745		CON5	46.1517	INCB5	31.9734
w6	176.936	CON6	317.285	INCB6	195.918		CON6	11.487	INCB6	39.492		CON6	0.465732	INCB6	0.384153		CON6	22.5366	INCB6	16.4516		CON6	28.7341	INCB6	20.5152
w7	122.505	CON7	191.938	INCB7	223.511		CON7	20.3697	INCB7	11.8571		CON7	0.427992	INCB7	0.33612		CON7	17.1546	INCB7	19.2306		CON7	31.4616	INCB7	24.0959
w8	117.116	CON8	75.9452	INCB8	122.657		CON8	18.18	INCB8	19.1697		CON8	0.415031	INCB8	0.384915		CON8	15.3255	INCB8	19.0155		CON8	24.2756	INCB8	31.6608
		CON11	268.578	INCB11	175.902		ave	17.7211	ave	21.3454		ave	0.440286	ave	0.372192		CON11	18.4862	INCB11	10.8079		CON11	30.4005	INCB11	15.25
		CON12	338.083	INCB12	96.9373		sem	3.74983	sem	3.71847		sem	0.0188196	sem	0.00985025		CON12	25.535	INCB12	17.9193		CON12	42.2184	INCB12	25.5687
		CON13	187.008	INCB13	122.229				p-value	0.44238				p-value	0.00634846		CON13	17.551	INCB13	14.849		CON13	28.703	INCB13	21.1689
		CON14	222.24	INCB14	133.346												ave	19.6232	ave	15.6764		ave	32.4499	ave	22.1667
		CON15	127.199	INCB15	174.483												sem	1.26128	sem	1.09555		sem	2.76018	sem	1.72396
		CON16	159.825	INCB16	110.65														p-value	0.0284004				p-value	0.00492719
		CON17	284.655	INCB17	251.556
				INCB18	84.1706
ave	128.377	ave	198.553	ave	142.519
sem	15.318	sem	21.0574	sem	15.0065
		p-value	0.0258648	p-value	0.0245608
