# Supplementary material for: Targeting senescent cells enhances adipogenesis and metabolic function in old age
Source: eLife. 2015 Dec 19;4:e12997. doi: 10.7554/eLife.12997 (PMC4758946; doi:10.7554/eLife.12997)
Supplement: Figure 8—source data 1. — DOI: http://dx.doi.org/10.7554/eLife.12997.025 [file elife-12997-fig8-data1.xlsx]

## Sheet: Sheet1
			23 months old					8 months old
Fig. 8a,b	0	15	30	60	120	AUC		Fig. 8b	AUC		Fig.8c	baseline	20 minutes	60 minutes
CON1	100	195.588	121.324	110.294	145.588	3744.49		Y-CON1	3725.49		CON1	0.421145	1.85353	0.892048
CON2	100	162.903	120.968	109.677	109.677	2141.13		Y-CON2	4282.89		CON2	0.381928	0.880516	0.399372
CON3	100	218.182	129.412	116.043	108.021	3397.06		Y-CON3	2125		CON3	0.434191	1.68878	0.328362
CON4	100	214.615	142.308	138.462	128.462	5255.77		Y-CON4	3589.29		CON4	0.388472	2.69108	0.438537
CON5	100	287.342	273.418	149.367	120.253	9541.14		Y-CON5	3223.96		CON5	0.366646	2.72793	0.41244
CON6	100	281.818	167.273	124.545	137.273	6463.64		Y-CON6	2660.38		CON6	0.930758	2.70075	0.742336
CON7	100	205.517	174.483	158.621	108.276	6144.83		ave	3267.83		CON7	1.05649	4.07786	0.661461
CON8	100	226.23	131.148	121.311	131.148	4487.7		sem	317.287		CON8	0.43745	1.43975	0.557481
CON9	100	203.521	142.958	130.282	116.197	4367.96		Y-INCB1	4111.89		CON9	0.495982	1.1132	0.823744
ave	100	221.746	155.921	128.734	122.766	5060.41		Y-INCB2	3506.02		ave	0.545896	2.13038	0.583976
sem	0	13.3007	15.9719	5.7165	4.53709	717.714		Y-INCB3	5696.69		sem	0.0861938	0.336132	0.0681272
INCB1	100	182.55	118.121	108.054	110.738	2330.54		Y-INCB4	4006.1
INCB2	100	211.628	161.24	113.178	130.233	4552.33		Y-INCB5	4082.78		INCB1	0.58973	2.60448	0.587583
INCB3	100	169.697	135.606	99.2424	103.03	1903.41		Y-INCB6	3013.55		INCB2	0.766335	2.23085	0.71208
INCB4	100	231.792	115.029	107.514	98.2659	2601.16		ave	4069.51		INCB3	0.796316	5.08242	0.561785
INCB5	100	258.491	141.509	118.868	124.528	4896.23		sem	369.065		INCB4	0.628322	1.18192	0.45699
INCB6	100	215.789	156.391	103.008	104.511	3276.32		p-value	0.130548		INCB5	0.965179	1.26851	0.546713
INCB7	100	297.196	129.907	123.364	89.7196	4373.83					INCB6	0.595097	1.28271	0.724291
INCB8	100	251.748	134.266	93.7063	95.8042	2638.11					INCB7	0.53917	3.34299	1.4677
INCB9	100	206.711	85.2349	93.2886	102.013	1026.85					INCB8	0.325076	1.72096
ave	100	225.067	130.812	106.692	106.538	3066.53					INCB9	0.391743	0.95997	0.401551
sem	0	13.2046	7.65377	3.51224	4.4192	414.78					ave	0.621885	2.18609	0.682337
p-value	1	0.861591	0.175452	0.00466125	0.0208817	0.030541					sem	0.0710103	0.472974	0.12024
											p-value	0.495296	0.92172	0.471251
			23 months old					8 months old
Fig. 8d,e	0	15	30	60	120	AOC		Fig. 8e	AOC		Fig.8f	glucose		Fig.8h	p-AKT/t-AKT fold
CON1	100	95.2941	62.3529	87.6471	102.353	1402.94		Y-CON1	5164.43		CON1	136		CON1	1.09623
CON2	100	90.1515	72.7273	82.5758	88.6364	1886.36		Y-CON2	6075.84		CON2	124		CON2	1.24236
CON3	100	99.4413	98.8827	108.38	109.497	-628.492		Y-CON3	4326.92		CON3	187		CON3	1.21148
CON4	100	81.9549	77.4436	81.9549	84.2105	2063.91		Y-CON4	4369.57		CON4	130		CON4	1.39839
CON5	100	97.2222	78.7037	96.2963	80.5556	1270.83		Y-CON5	4366.94		CON5	79		CON5	1.14743
CON6	100	67.7966	60.1695	74.5763	85.5932	2955.51		Y-CON6	4561.22		CON6	110		CON6	0.836256
CON7	100	104.918	95.9016	90.9836	110.656	104.508		ave	4810.82		CON7	145		ave	1.15536
CON8	100	104.31	105.172	98.2759	97.4138	-25.8621		sem	283.638		CON8	122		sem	0.0764126
CON9	100	101.429	97.1429	98.5714	90	407.143		Y-INCB1	5871.43		CON9	142		INCB1	2.2485
ave	100	93.6131	83.1663	91.029	94.3239	1048.54		Y-INCB2	4665.09		ave	130.556		INCB2	1.74307
sem	0	4.02686	5.54338	3.48435	3.70826	387.546		Y-INCB3	3602.27		sem	9.68405		INCB3	1.63536
INCB1	100	96.4103	63.0769	58.9744	62.0513	3869.23		Y-INCB4	5379.46					INCB4	1.38781
INCB2	100	91.7722	79.1139	94.9367	98.1013	878.165		Y-INCB5	5070		INCB1	149		INCB5	1.28066
INCB3	100	84.3137	75.817	79.7386	90.8497	1965.69		Y-INCB6	4781.25		INCB2	129		INCB6	1.33575
INCB4	100	95.5696	82.9114	91.7722	94.9367	973.101		ave	4894.92		INCB3	132		ave	1.60519
INCB5	100	73.6842	64.9123	61.4035	75.4386	3657.89		sem	313.883		INCB4	173		sem	0.148205
INCB6	100	85.9375	71.0938	83.5938	80.4688	2185.55		p-value	0.846411		INCB5	106
INCB7	100	78.1818	72.7273	63.6364	72.7273	3395.45					INCB6	133		p-value	0.0223994
INCB8	100	95.8042	69.9301	51.7483	52.4476	4337.41					INCB7	107
INCB9	100	96.6667	91.6667	83.3333	77.5	1662.5					INCB8	143
ave	100	88.7045	74.5833	74.3486	78.2801	2547.22					INCB9	149
sem	0	2.86984	2.9964	5.20706	5.00461	431.743					ave	135.667
p-value	1	0.335647	0.19204	0.0170345	0.0203155	0.020012					sem	7.04154
											p-value	0.675163
